# Supplementary material
Source: PubMed Central journal article supplement (PMC3057921)

## Supplementary Figure 1

Expression of type I and type III IFNs in fresh bat splenocytes at six hours post infection with TioPV. Fresh splenocytes from three individual bats (bats 1-3) were challenged with TioPV for 6 hours at a multiplicity of infection 0.1. The cellular RNA was extracted and IFN mRNA level was measured by qRT-PCR. Data are shown as fold change of expression obtained from comparison of the virus challenged and mock challenge group. The gene expression level had been normalized against GAPDH.

Supplementary FIGURE 1.

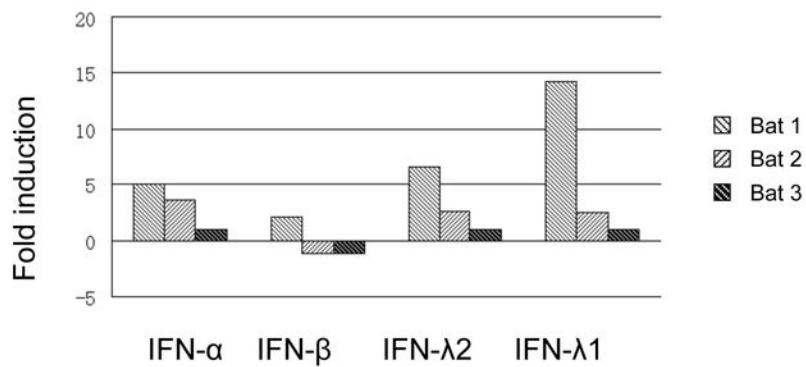

Supplement: NIHMS275429-supplement-Supplementary_figure_1.pdf [file NIHMS275429-supplement-Supplementary_figure_1.pdf]
